# Supplementary material for: GDF15 Promotes Cell Growth, Migration, and Invasion in Gastric Cancer by Inducing STAT3 Activation
Source: MDPI journal article supplement (doi:10.3390/ijms24032925), 2023-02-02
Supplement: s1 [file s1]

# GDF15 Promotes Cell Growth, Migration, and Invasion in Gastric Cancer by Inducing STAT3 Activation

Mina Joo <sup>1</sup>, Donghyun Kim <sup>2</sup>, Myung-Won Lee <sup>3</sup>, Hyo Jin Lee <sup>3,4,\*</sup> and Jin-Man Kim <sup>1,2,3,\*</sup>

<sup>1</sup> Department of Medical Science, College of Medicine, Chungnam National University, Daejeon 35015, Republic of Korea

<sup>2</sup> Department of Pathology, College of Medicine, Chungnam National University, Daejeon 35015, Republic of Korea

<sup>3</sup> Department of Internal Medicine, College of Medicine, Chungnam National University, Daejeon 35015, Republic of Korea

<sup>4</sup> Infection Control Convergence Research Center, College of Medicine, Chungnam National University, Daejeon 35015, Republic of Korea

\* Correspondence: cymed@cnu.ac.kr (H.J.L.); jinmank@cnu.ac.kr (J.-M.K.); Tel.: +82-42-280-8369 (H.J.L.); +82-42-580-8237 (J.-M.K.)

**Supplementary Table S1.** Patient information analyzed for mRNA expression of GDF15.

| Patient No. | Age (yr) | Gender | Type                       | <i>H. Pylori</i> |
|-------------|----------|--------|----------------------------|------------------|
| 1           | 81       | Male   | Adenocarcinoma, intestinal | -                |
| 2           | 96       | Female | Adenocarcinoma, diffuse    | -                |
| 3           | 69       | Male   | Adenocarcinoma, intestinal | -                |
| 4           | 80       | Female | Adenocarcinoma, diffuse    | +                |

**Supplementary Table S2.** Baseline characteristics of the CNUH cohort.

| Patient No. | GDF15 Expression | Age | Gender | Live or Death | DAYS | OS (mon) | OS (yr) | Location | Size  | Differentiation  | Lymphatic Invasion | Venous Invasion | T Stage |
|-------------|------------------|-----|--------|---------------|------|----------|---------|----------|-------|------------------|--------------------|-----------------|---------|
| 1           | 2                | 50  | male   | live          | 1912 | 63.73    | 5.3     | lower    | ≤ 5cm | undifferentiated | invasion           | invasion        | 1       |
| 2           | 2                | 68  | female | live          | 2385 | 79.50    | 6.6     | lower    | ≤ 5cm | differentiated   | no invasion        | no invasion     | 1       |
| 3           | 3                | 71  | female | death         | 401  | 13.37    | 1.1     | middle   | > 5cm | undifferentiated | invasion           | no invasion     | 4       |
| 4           | 2                | 72  | male   | live          | 1243 | 41.43    | 3.5     | lower    | ≤ 5cm | differentiated   | no invasion        | invasion        | 1       |
| 5           | 2                | 75  | female | live          | 1826 | 60.87    | 5.1     | middle   | ≤ 5cm | undifferentiated | no invasion        | no invasion     | 1       |
| 6           | 3                | 61  | male   | death         | 243  | 8.10     | 0.7     | lower    | ≤ 5cm | differentiated   | no invasion        | no invasion     | 2       |
| 7           | 3                | 60  | male   | death         | 194  | 6.47     | 0.5     | middle   | ≤ 5cm | differentiated   | invasion           | invasion        | 1       |
| 8           | 1                | 71  | male   | live          | 1925 | 64.17    | 5.3     | middle   | ≤ 5cm | differentiated   | no invasion        | no invasion     | 1       |
| 9           | 2                | 64  | male   | live          | 1673 | 55.77    | 4.6     | middle   | ≤ 5cm | undifferentiated | no invasion        | no invasion     | 1       |
| 10          | 2                | 46  | female | death         | 394  | 13.13    | 1.1     | middle   | > 5cm | undifferentiated | no invasion        | no invasion     | 3       |
| 11          | 2                | 50  | male   | live          | 1698 | 56.60    | 4.7     | middle   | ≤ 5cm | differentiated   | no invasion        | invasion        | 1       |
| 12          | 0                | 38  | male   | death         | 8    | 0.27     | 0.0     | lower    | ≤ 5cm | differentiated   | invasion           | invasion        | 1       |
| 13          | 1                | 53  | female | live          | 1951 | 65.03    | 5.4     | middle   | ≤ 5cm | differentiated   | no invasion        | no invasion     | 1       |
| 14          | 1                | 68  | male   | live          | 1356 | 45.20    | 3.8     | lower    | ≤ 5cm | differentiated   | no invasion        | no invasion     | 1       |
| 15          | 1                | 55  | male   | live          | 2093 | 69.77    | 5.8     | middle   | ≤ 5cm | differentiated   | no invasion        | no invasion     | 3       |
| 16          | 1                | 45  | male   | live          | 1518 | 50.60    | 4.2     | lower    | ≤ 5cm | undifferentiated | no invasion        | no invasion     | 1       |
| 17          | 2                | 66  | male   | live          | 1572 | 52.40    | 4.4     | middle   | ≤ 5cm | differentiated   | invasion           | no invasion     | 1       |
| 18          | 3                | 61  | male   | death         | 572  | 19.07    | 1.6     | lower    | ≤ 5cm | differentiated   | no invasion        | no invasion     | 1       |
| 19          | 2                | 60  | male   | death         | 927  | 30.90    | 2.6     | middle   | > 5cm | undifferentiated | no invasion        | no invasion     | 3       |
| 20          | 1                | 68  | female | live          | 1551 | 51.70    | 4.3     | lower    | ≤ 5cm | differentiated   | no invasion        | no invasion     | 1       |
| 21          | 2                | 43  | female | live          | 1843 | 61.43    | 5.1     | lower    | ≤ 5cm | differentiated   | no invasion        | invasion        | 1       |
| 22          | 2                | 69  | male   | death         | 883  | 29.43    | 2.5     | lower    | ≤ 5cm | differentiated   | no invasion        | no invasion     | 3       |
| 23          | 0                | 62  | male   | death         | 980  | 32.67    | 2.7     | middle   | > 5cm | undifferentiated | no invasion        | no invasion     | 2       |
| 24          | 2                | 75  | male   | death         | 67   | 2.23     | 0.2     | lower    | ≤ 5cm | undifferentiated | invasion           | invasion        | 1       |

|    |   |    |        |       |      |       |     |        |       |                  |             |             |   |
|----|---|----|--------|-------|------|-------|-----|--------|-------|------------------|-------------|-------------|---|
| 25 | 3 | 54 | male   | death | 353  | 11.77 | 1.0 | lower  | > 5cm | undifferentiated | no invasion | no invasion | 3 |
| 26 | 1 | 63 | female | death | 827  | 27.57 | 2.3 | lower  | ≤ 5cm | undifferentiated | no invasion | no invasion | 3 |
| 27 | 2 | 50 | male   | live  | 1491 | 49.70 | 4.1 | middle | ≤ 5cm | undifferentiated | invasion    | no invasion | 1 |
| 28 | 0 | 68 | male   | live  | 1600 | 53.33 | 4.4 | middle | ≤ 5cm | undifferentiated | no invasion | no invasion | 1 |
| 29 | 2 | 69 | male   | live  | 1856 | 61.87 | 5.2 | lower  | ≤ 5cm | differentiated   | no invasion | no invasion | 1 |
| 30 | 2 | 74 | female | death | 1529 | 50.97 | 4.2 | middle | ≤ 5cm | undifferentiated | no invasion | no invasion | 3 |
| 31 | 1 | 54 | male   | death | 199  | 6.63  | 0.6 | lower  | ≤ 5cm | undifferentiated | no invasion | no invasion | 1 |
| 32 | 2 | 60 | male   | live  | 1240 | 41.33 | 3.4 | middle | ≤ 5cm | undifferentiated | no invasion | invasion    | 1 |
| 33 | 0 | 40 | female | live  | 1793 | 59.77 | 5.0 | middle | ≤ 5cm | undifferentiated | invasion    | invasion    | 1 |
| 34 | 1 | 66 | male   | live  | 1936 | 64.53 | 5.4 | middle | ≤ 5cm | differentiated   | no invasion | no invasion | 1 |
| 35 | 0 | 68 | male   | death | 1434 | 47.80 | 4.0 | middle | ≤ 5cm | differentiated   | invasion    | invasion    | 1 |
| 36 | 0 | 60 | female | live  | 1734 | 57.80 | 4.8 | middle | ≤ 5cm | undifferentiated | no invasion | no invasion | 1 |
| 37 | 1 | 69 | female | live  | 1739 | 57.97 | 4.8 | lower  | > 5cm | differentiated   | no invasion | no invasion | 2 |
| 38 | 2 | 62 | male   | death | 873  | 29.10 | 2.4 | middle | ≤ 5cm | differentiated   | no invasion | no invasion | 1 |
| 39 | 3 | 59 | male   | live  | 1503 | 50.10 | 4.2 | middle | ≤ 5cm | undifferentiated | no invasion | no invasion | 1 |
| 40 | 3 | 70 | male   | death | 607  | 20.23 | 1.7 | lower  | ≤ 5cm | differentiated   | no invasion | no invasion | 1 |
| 41 | 2 | 68 | female | death | 1168 | 38.93 | 3.2 | lower  | ≤ 5cm | differentiated   | no invasion | no invasion | 1 |
| 42 | 0 | 54 | male   | live  | 2227 | 74.23 | 6.2 | lower  | ≤ 5cm | undifferentiated | no invasion | no invasion | 2 |
| 43 | 1 | 73 | female | death | 452  | 15.07 | 1.3 | lower  | > 5cm | undifferentiated | no invasion | no invasion | 3 |
| 44 | 1 | 55 | male   | death | 523  | 17.43 | 1.5 | middle | > 5cm | undifferentiated | no invasion | no invasion | 3 |
| 45 | 2 | 60 | male   | live  | 1541 | 51.37 | 4.3 | lower  | ≤ 5cm | differentiated   | no invasion | no invasion | 1 |
| 46 | 2 | 86 | male   | death | 46   | 1.53  | 0.1 | middle | ≤ 5cm | undifferentiated | no invasion | no invasion | 3 |
| 47 | 3 | 39 | male   | death | 846  | 28.20 | 2.4 | middle | ≤ 5cm | undifferentiated | no invasion | invasion    | 3 |
| 48 | 1 | 63 | male   | death | 1167 | 38.90 | 3.2 | upper  | ≤ 5cm | undifferentiated | no invasion | no invasion | 3 |
| 49 | 2 | 63 | male   | death | 1349 | 44.97 | 3.7 | lower  | > 5cm | undifferentiated | no invasion | no invasion | 3 |
| 50 | 2 | 70 | female | live  | 2443 | 81.43 | 6.8 | lower  | ≤ 5cm | differentiated   | invasion    | no invasion | 1 |
| 51 | 3 | 49 | male   | live  | 2025 | 67.50 | 5.6 | middle | ≤ 5cm | undifferentiated | no invasion | no invasion | 2 |
| 52 | 2 | 58 | female | live  | 1794 | 59.80 | 5.0 | lower  | > 5cm | undifferentiated | no invasion | no invasion | 2 |
| 53 | 3 | 77 | male   | death | 283  | 9.43  | 0.8 | middle | ≤ 5cm | undifferentiated | no invasion | invasion    | 3 |
| 54 | 3 | 59 | male   | live  | 2108 | 70.27 | 5.9 | middle | ≤ 5cm | undifferentiated | no invasion | no invasion | 2 |
| 55 | 3 | 66 | male   | death | 204  | 6.80  | 0.6 | middle | ≤ 5cm | differentiated   | no invasion | no invasion | 3 |
| 56 | 3 | 48 | male   | death | 457  | 15.23 | 1.3 | middle | > 5cm | undifferentiated | no invasion | no invasion | 3 |
| 57 | 3 | 82 | female | death | 180  | 6.00  | 0.5 | middle | ≤ 5cm | undifferentiated | no invasion | no invasion | 3 |
| 58 | 2 | 44 | female | live  | 1771 | 59.03 | 4.9 | lower  | ≤ 5cm | differentiated   | invasion    | no invasion | 1 |
| 59 | 3 | 68 | male   | death | 446  | 14.87 | 1.2 | middle | > 5cm | undifferentiated | no invasion | no invasion | 3 |
| 60 | 3 | 40 | male   | live  | 2018 | 67.27 | 5.6 | middle | > 5cm | undifferentiated | no invasion | no invasion | 1 |
| 61 | 1 | 43 | male   | live  | 2172 | 72.40 | 6.0 | middle | ≤ 5cm | undifferentiated | no invasion | no invasion | 2 |
| 62 | 3 | 60 | male   | death | 1409 | 46.97 | 3.9 | upper  | > 5cm | differentiated   | no invasion | no invasion | 3 |
| 63 | 1 | 54 | male   | live  | 1671 | 55.70 | 4.6 | middle | ≤ 5cm | differentiated   | invasion    | invasion    | 1 |
| 64 | 1 | 33 | male   | death | 459  | 15.30 | 1.3 | middle | ≤ 5cm | undifferentiated | no invasion | no invasion | 3 |
| 65 | 3 | 67 | female | death | 438  | 14.60 | 1.2 | lower  | ≤ 5cm | differentiated   | no invasion | no invasion | 2 |
| 66 | 1 | 74 | male   | death | 536  | 17.87 | 1.5 | middle | ≤ 5cm | undifferentiated | no invasion | no invasion | 1 |
| 67 | 3 | 50 | male   | death | 42   | 1.40  | 0.1 | lower  | > 5cm | undifferentiated | no invasion | no invasion | 3 |
| 68 | 1 | 79 | male   | death | 413  | 13.77 | 1.1 | lower  | ≤ 5cm | undifferentiated | no invasion | no invasion | 3 |
| 69 | 1 | 69 | male   | live  | 1435 | 47.83 | 4.0 | lower  | ≤ 5cm | undifferentiated | no invasion | no invasion | 1 |
| 70 | 0 | 46 | female | death | 653  | 21.77 | 1.8 | middle | ≤ 5cm | undifferentiated | no invasion | no invasion | 3 |
| 71 | 2 | 70 | male   | death | 1221 | 40.70 | 3.4 | middle | > 5cm | differentiated   | no invasion | no invasion | 3 |
| 72 | 3 | 77 | female | death | 370  | 12.33 | 1.0 | lower  | ≤ 5cm | differentiated   | no invasion | no invasion | 2 |
| 73 | 2 | 63 | female | live  | 1984 | 66.13 | 5.5 | lower  | > 5cm | undifferentiated | no invasion | no invasion | 1 |
| 74 | 1 | 50 | female | death | 294  | 9.80  | 0.8 | upper  | ≤ 5cm | undifferentiated | no invasion | no invasion | 3 |
| 75 | 1 | 50 | female | death | 1598 | 53.27 | 4.4 | lower  | ≤ 5cm | differentiated   | no invasion | no invasion | 2 |
| 76 | 2 | 59 | male   | live  | 2252 | 75.07 | 6.3 | lower  | > 5cm | undifferentiated | no invasion | no invasion | 2 |

|     |   |    |        |       |      |       |     |        |       |                  |             |             |   |
|-----|---|----|--------|-------|------|-------|-----|--------|-------|------------------|-------------|-------------|---|
| 77  | 2 | 63 | male   | death | 369  | 12.30 | 1.0 | middle | > 5cm | undifferentiated | no invasion | no invasion | 3 |
| 78  | 0 | 67 | male   | death | 470  | 15.67 | 1.3 | middle | > 5cm | undifferentiated | no invasion | no invasion | 3 |
| 79  | 3 | 66 | male   | death | 144  | 4.80  | 0.4 | lower  | > 5cm | undifferentiated | no invasion | invasion    | 3 |
| 80  | 1 | 58 | male   | death | 795  | 26.50 | 2.2 | middle | ≤ 5cm | undifferentiated | no invasion | no invasion | 3 |
| 81  | 0 | 64 | female | death | 618  | 20.60 | 1.7 | upper  | > 5cm | undifferentiated | invasion    | invasion    | 2 |
| 82  | 2 | 64 | female | death | 519  | 17.30 | 1.4 | middle | > 5cm | undifferentiated | no invasion | no invasion | 3 |
| 83  | 2 | 60 | male   | death | 600  | 20.00 | 1.7 | middle | ≤ 5cm | undifferentiated | invasion    | no invasion | 1 |
| 84  | 3 | 62 | male   | death | 562  | 18.73 | 1.6 | upper  | > 5cm | undifferentiated | no invasion | no invasion | 2 |
| 85  | 1 | 63 | female | death | 344  | 11.47 | 1.0 | lower  | > 5cm | undifferentiated | no invasion | no invasion | 3 |
| 86  | 1 | 55 | male   | live  | 1924 | 64.13 | 5.3 | lower  | ≤ 5cm | undifferentiated | no invasion | no invasion | 1 |
| 87  | 2 | 66 | male   | live  | 2089 | 69.63 | 5.8 | middle | ≤ 5cm | differentiated   | no invasion | no invasion | 1 |
| 88  | 3 | 54 | female | live  | 2055 | 68.50 | 5.7 | lower  | ≤ 5cm | differentiated   | no invasion | no invasion | 2 |
| 89  | 0 | 63 | male   | live  | 1828 | 60.93 | 5.1 | lower  | ≤ 5cm | undifferentiated | invasion    | invasion    | 1 |
| 90  | 1 | 36 | male   | live  | 1782 | 59.40 | 5.0 | middle | ≤ 5cm | undifferentiated | no invasion | no invasion | 2 |
| 91  | 3 | 36 | male   | death | 520  | 17.33 | 1.4 | upper  | > 5cm | undifferentiated | invasion    | invasion    | 3 |
| 92  | 1 | 43 | female | death | 1511 | 50.37 | 4.2 | lower  | ≤ 5cm | undifferentiated | invasion    | invasion    | 1 |
| 93  | 1 | 52 | male   | live  | 1591 | 53.03 | 4.4 | middle | ≤ 5cm | undifferentiated | no invasion | no invasion | 1 |
| 94  | 3 | 67 | male   | death | 758  | 25.27 | 2.1 | lower  | ≤ 5cm | undifferentiated | no invasion | no invasion | 3 |
| 95  | 3 | 61 | male   | death | 576  | 19.20 | 1.6 | middle | ≤ 5cm | undifferentiated | no invasion | no invasion | 1 |
| 96  | 2 | 51 | male   | death | 578  | 19.27 | 1.6 | middle | > 5cm | undifferentiated | no invasion | no invasion | 3 |
| 97  | 2 | 60 | male   | death | 364  | 12.13 | 1.0 | middle | ≤ 5cm | differentiated   | invasion    | invasion    | 1 |
| 98  | 0 | 51 | male   | death | 684  | 22.80 | 1.9 | lower  | ≤ 5cm | differentiated   | no invasion | no invasion | 3 |
| 99  | 0 | 29 | female | live  | 1888 | 62.93 | 5.3 | middle | ≤ 5cm | undifferentiated | invasion    | invasion    | 1 |
| 100 | 2 | 61 | male   | death | 748  | 24.93 | 2.1 | lower  | > 5cm | differentiated   | no invasion | no invasion | 1 |
| 101 | 1 | 58 | female | live  | 2029 | 67.63 | 5.6 | middle | ≤ 5cm | differentiated   | invasion    | invasion    | 1 |
| 102 | 1 | 72 | female | death | 880  | 29.33 | 2.4 | lower  | > 5cm | undifferentiated | no invasion | no invasion | 2 |
| 103 | 1 | 69 | female | death | 1584 | 52.80 | 4.4 | lower  | ≤ 5cm | differentiated   | invasion    | invasion    | 1 |
| 104 | 3 | 66 | male   | death | 762  | 25.40 | 2.1 | lower  | ≤ 5cm | undifferentiated | no invasion | no invasion | 3 |
| 105 | 1 | 53 | male   | live  | 1957 | 65.23 | 5.4 | middle | ≤ 5cm | differentiated   | invasion    | invasion    | 1 |
| 106 | 0 | 38 | male   | death | 1515 | 50.50 | 4.2 | middle | ≤ 5cm | undifferentiated | no invasion | no invasion | 2 |
| 107 | 2 | 66 | male   | live  | 1560 | 52.00 | 4.3 | lower  | ≤ 5cm | differentiated   | no invasion | no invasion | 2 |
| 108 | 3 | 67 | female | death | 329  | 10.97 | 0.9 | lower  | > 5cm | undifferentiated | no invasion | no invasion | 3 |
| 109 | 2 | 57 | male   | live  | 1905 | 63.50 | 5.3 | lower  | ≤ 5cm | differentiated   | invasion    | invasion    | 1 |
| 110 | 2 | 57 | female | live  | 1884 | 62.80 | 5.2 | lower  | ≤ 5cm | undifferentiated | no invasion | no invasion | 1 |
| 111 | 2 | 54 | male   | live  | 1832 | 61.07 | 5.1 | lower  | ≤ 5cm | undifferentiated | invasion    | invasion    | 1 |
| 112 | 3 | 54 | male   | death | 1358 | 45.27 | 3.8 | lower  | > 5cm | differentiated   | no invasion | no invasion | 3 |
| 113 | 1 | 44 | male   | death | 1518 | 50.60 | 4.2 | upper  | ≤ 5cm | differentiated   | no invasion | no invasion | 1 |
| 114 | 2 | 80 | male   | death | 1154 | 38.47 | 3.2 | middle | ≤ 5cm | differentiated   | no invasion | no invasion | 2 |
| 115 | 3 | 66 | male   | live  | 1804 | 60.13 | 5.0 | lower  | ≤ 5cm | undifferentiated | no invasion | no invasion | 3 |
| 116 | 3 | 42 | female | death | 531  | 17.70 | 1.5 | lower  | ≤ 5cm | differentiated   | no invasion | no invasion | 1 |
| 117 | 2 | 39 | male   | live  | 1758 | 58.60 | 4.9 | lower  | ≤ 5cm | differentiated   | no invasion | no invasion | 1 |
| 118 | 1 | 41 | female | death | 1009 | 33.63 | 2.8 | middle | ≤ 5cm | undifferentiated | no invasion | no invasion | 3 |
| 119 | 3 | 68 | male   | death | 107  | 3.57  | 0.3 | upper  | > 5cm | undifferentiated | no invasion | no invasion | 3 |
| 120 | 2 | 43 | male   | live  | 1828 | 60.93 | 5.1 | lower  | ≤ 5cm | differentiated   | no invasion | no invasion | 1 |
| 121 | 2 | 41 | female | live  | 1833 | 61.10 | 5.1 | middle | ≤ 5cm | undifferentiated | invasion    | invasion    | 1 |
| 122 | 2 | 55 | male   | death | 217  | 7.23  | 0.6 | middle | > 5cm | undifferentiated | no invasion | no invasion | 3 |
| 123 | 2 | 61 | male   | live  | 1560 | 52.00 | 4.3 | upper  | ≤ 5cm | differentiated   | no invasion | no invasion | 1 |
| 124 | 2 | 63 | male   | live  | 1764 | 58.80 | 4.9 | middle | ≤ 5cm | differentiated   | invasion    | invasion    | 1 |
| 125 | 2 | 52 | female | live  | 1526 | 50.87 | 4.2 | middle | ≤ 5cm | differentiated   | no invasion | no invasion | 1 |
| 126 | 2 | 70 | female | death | 284  | 9.47  | 0.8 | lower  | ≤ 5cm | differentiated   | no invasion | no invasion | 1 |
| 127 | 1 | 44 | female | live  | 1622 | 54.07 | 4.5 | middle | ≤ 5cm | undifferentiated | no invasion | no invasion | 1 |
| 128 | 2 | 59 | female | live  | 1790 | 59.67 | 5.0 | lower  | ≤ 5cm | undifferentiated | no invasion | no invasion | 1 |

|     |   |    |        |       |      |       |     |        |       |                  |             |             |   |
|-----|---|----|--------|-------|------|-------|-----|--------|-------|------------------|-------------|-------------|---|
| 129 | 3 | 60 | male   | death | 740  | 24.67 | 2.1 | middle | ≤ 5cm | differentiated   | no invasion | no invasion | 3 |
| 130 | 1 | 47 | male   | live  | 1789 | 59.63 | 5.0 | lower  | ≤ 5cm | differentiated   | invasion    | invasion    | 1 |
| 131 | 3 | 41 | male   | live  | 1586 | 52.87 | 4.4 | middle | ≤ 5cm | differentiated   | invasion    | invasion    | 1 |
| 132 | 1 | 54 | male   | live  | 1751 | 58.37 | 4.9 | lower  | ≤ 5cm | differentiated   | invasion    | invasion    | 1 |
| 133 | 2 | 58 | male   | death | 342  | 11.40 | 1.0 | middle | ≤ 5cm | differentiated   | no invasion | no invasion | 1 |
| 134 | 1 | 72 | male   | death | 682  | 22.73 | 1.9 | middle | ≤ 5cm | differentiated   | invasion    | invasion    | 1 |
| 135 | 0 | 57 | female | live  | 1737 | 57.90 | 4.8 | lower  | ≤ 5cm | differentiated   | no invasion | no invasion | 1 |
| 136 | 0 | 37 | female | live  | 1587 | 52.90 | 4.4 | middle | ≤ 5cm | undifferentiated | no invasion | no invasion | 1 |
| 137 | 1 | 59 | male   | death | 458  | 15.27 | 1.3 | middle | ≤ 5cm | differentiated   | no invasion | no invasion | 1 |
| 138 | 2 | 66 | male   | death | 7    | 0.23  | 0.0 | middle | ≤ 5cm | differentiated   | no invasion | no invasion | 1 |
| 139 | 0 | 49 | male   | live  | 1285 | 42.83 | 3.6 | lower  | ≤ 5cm | differentiated   | invasion    | invasion    | 1 |
| 140 | 1 | 47 | male   | live  | 1714 | 57.13 | 4.8 | lower  | ≤ 5cm | differentiated   | invasion    | invasion    | 1 |
| 141 | 2 | 69 | female | death | 1107 | 36.90 | 3.1 | middle | ≤ 5cm | differentiated   | invasion    | invasion    | 1 |
| 142 | 2 | 65 | male   | live  | 1662 | 55.40 | 4.6 | lower  | ≤ 5cm | differentiated   | no invasion | no invasion | 1 |
| 143 | 3 | 66 | male   | death | 1137 | 37.90 | 3.2 | middle | ≤ 5cm | undifferentiated | no invasion | no invasion | 1 |
| 144 | 3 | 53 | male   | live  | 1671 | 55.70 | 4.6 | lower  | ≤ 5cm | undifferentiated | no invasion | no invasion | 1 |
| 145 | 1 | 69 | male   | death | 7    | 0.23  | 0.0 | middle | ≤ 5cm | differentiated   | invasion    | invasion    | 1 |
| 146 | 2 | 59 | male   | death | 168  | 5.60  | 0.5 | middle | ≤ 5cm | differentiated   | no invasion | no invasion | 1 |
| 147 | 0 | 41 | male   | live  | 1380 | 46.00 | 3.8 | lower  | ≤ 5cm | undifferentiated | no invasion | no invasion | 1 |
| 148 | 0 | 49 | male   | death | 586  | 19.53 | 1.6 | middle | ≤ 5cm | differentiated   | invasion    | invasion    | 1 |
| 149 | 3 | 47 | male   | live  | 1584 | 52.80 | 4.4 | middle | ≤ 5cm | differentiated   | invasion    | invasion    | 1 |
| 150 | 3 | 67 | male   | live  | 1625 | 54.17 | 4.5 | middle | ≤ 5cm | undifferentiated | no invasion | no invasion | 1 |
| 151 | 1 | 58 | female | live  | 1369 | 45.63 | 3.8 | middle | ≤ 5cm | undifferentiated | no invasion | no invasion | 1 |
| 152 | 2 | 39 | male   | death | 1062 | 35.40 | 3.0 | lower  | ≤ 5cm | undifferentiated | no invasion | no invasion | 1 |
| 153 | 1 | 42 | male   | live  | 1419 | 47.30 | 3.9 | middle | ≤ 5cm | differentiated   | no invasion | no invasion | 1 |
| 154 | 1 | 69 | male   | live  | 1474 | 49.13 | 4.1 | lower  | ≤ 5cm | differentiated   | invasion    | invasion    | 1 |
| 155 | 0 | 60 | male   | live  | 1211 | 40.37 | 3.4 | lower  | ≤ 5cm | differentiated   | no invasion | no invasion | 1 |
| 156 | 1 | 72 | male   | death | 566  | 18.87 | 1.6 | middle | ≤ 5cm | differentiated   | no invasion | no invasion | 1 |
| 157 | 1 | 59 | male   | death | 875  | 29.17 | 2.4 | middle | ≤ 5cm | undifferentiated | no invasion | no invasion | 1 |
| 158 | 1 | 64 | male   | death | 326  | 10.87 | 0.9 | lower  | ≤ 5cm | undifferentiated | no invasion | no invasion | 1 |
| 159 | 0 | 45 | male   | death | 1030 | 34.33 | 2.9 | lower  | ≤ 5cm | differentiated   | invasion    | invasion    | 1 |
| 160 | 3 | 62 | female | death | 861  | 28.70 | 2.4 | lower  | ≤ 5cm | differentiated   | no invasion | no invasion | 1 |
| 161 | 2 | 66 | male   | live  | 1404 | 46.80 | 3.9 | lower  | ≤ 5cm | differentiated   | no invasion | no invasion | 1 |
| 162 | 3 | 50 | male   | live  | 1218 | 40.60 | 3.4 | middle | ≤ 5cm | differentiated   | no invasion | no invasion | 1 |
| 163 | 3 | 76 | female | live  | 1504 | 50.13 | 4.2 | middle | ≤ 5cm | undifferentiated | no invasion | no invasion | 1 |
| 164 | 2 | 59 | female | live  | 1213 | 40.43 | 3.4 | middle | ≤ 5cm | undifferentiated | no invasion | no invasion | 1 |
| 165 | 3 | 69 | male   | live  | 1430 | 47.67 | 4.0 | lower  | ≤ 5cm | undifferentiated | no invasion | no invasion | 1 |
| 166 | 2 | 58 | male   | live  | 1280 | 42.67 | 3.6 | middle | ≤ 5cm | undifferentiated | no invasion | no invasion | 1 |
| 167 | 2 | 63 | male   | death | 1003 | 33.43 | 2.8 | lower  | ≤ 5cm | differentiated   | no invasion | no invasion | 1 |
| 168 | 3 | 47 | female | live  | 1097 | 36.57 | 3.0 | upper  | ≤ 5cm | undifferentiated | no invasion | no invasion | 1 |
| 169 | 0 | 78 | female | live  | 1344 | 44.80 | 3.7 | upper  | ≤ 5cm | differentiated   | no invasion | no invasion | 1 |
| 170 | 3 | 45 | male   | live  | 1052 | 35.07 | 2.9 | middle | ≤ 5cm | undifferentiated | invasion    | no invasion | 1 |
| 171 | 2 | 40 | male   | death | 1033 | 34.43 | 2.9 | middle | ≤ 5cm | differentiated   | invasion    | invasion    | 1 |
| 172 | 1 | 68 | male   | death | 473  | 15.77 | 1.3 | lower  | ≤ 5cm | differentiated   | invasion    | invasion    | 1 |
| 173 | 2 | 63 | male   | death | 453  | 15.10 | 1.3 | middle | ≤ 5cm | differentiated   | invasion    | invasion    | 1 |
| 174 | 3 | 66 | male   | death | 712  | 23.73 | 2.0 | middle | ≤ 5cm | undifferentiated | no invasion | no invasion | 1 |
| 175 | 3 | 56 | male   | live  | 1330 | 44.33 | 3.7 | middle | ≤ 5cm | differentiated   | no invasion | no invasion | 1 |
| 176 | 2 | 60 | male   | live  | 1161 | 38.70 | 3.2 | lower  | ≤ 5cm | differentiated   | no invasion | no invasion | 1 |
| 177 | 1 | 67 | male   | live  | 1293 | 43.10 | 3.6 | middle | ≤ 5cm | differentiated   | no invasion | no invasion | 1 |
| 178 | 1 | 69 | male   | death | 564  | 18.80 | 1.6 | middle | ≤ 5cm | undifferentiated | no invasion | no invasion | 1 |

\* OS: Overall Survival.

**Supplementary Table S3.** Primer sequences for RT-qPCR.

| Gene  | Forward (5'-3')      | Reverse (3'-5')      |
|-------|----------------------|----------------------|
| GDF15 | CTCCAGATTCCGAGAGTTGC | ACCTGCACCTGCGTATCTCT |
| GAPDH | TTGATTTTGGAGGGATCTCG | GAGTCAACGGATTGTCGT   |

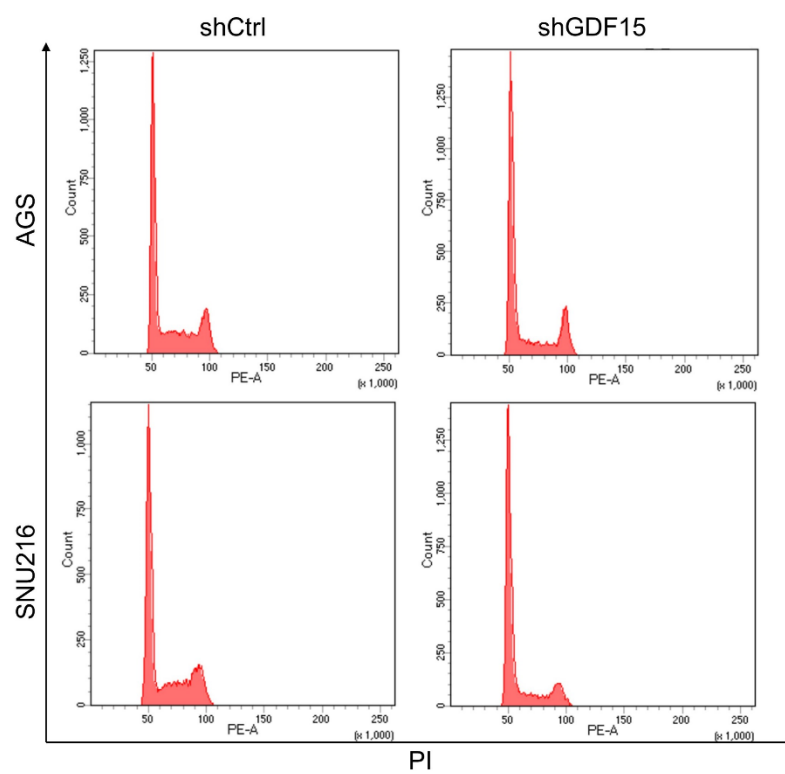

**Supplementary Figure S1.** Cell cycle analysis by FACS of GDF15-knockdown cells after propidium iodide (PI) staining. Knockdown of GDF15 significantly increased the proportion of cells in the G0/G1 phase compared with the control, whereas it decreased the proportion of cells in S phase and G2/M phase.

**A**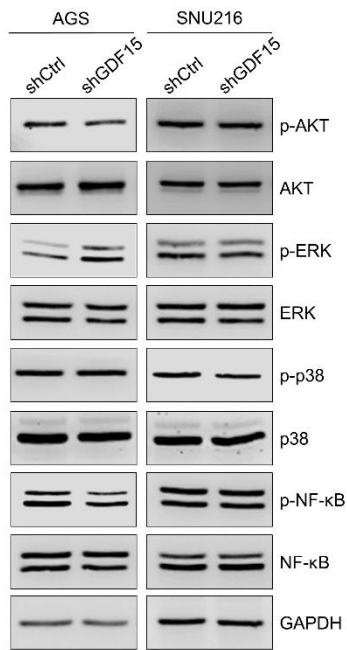**B**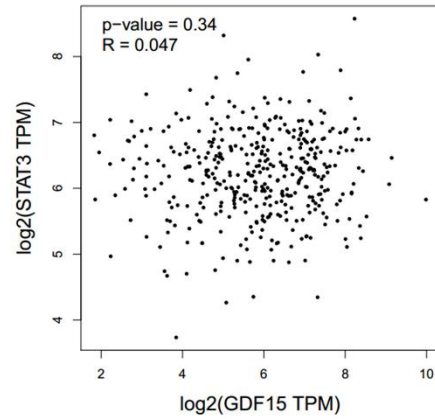**C**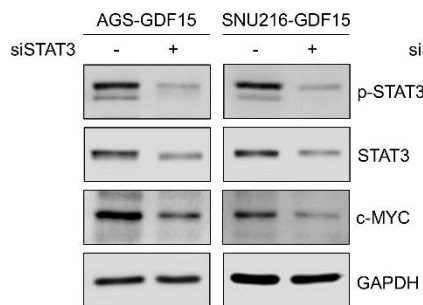**D**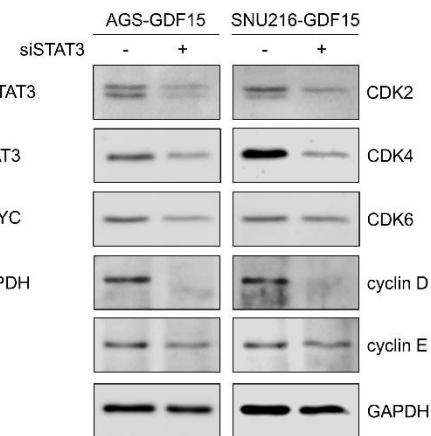**E**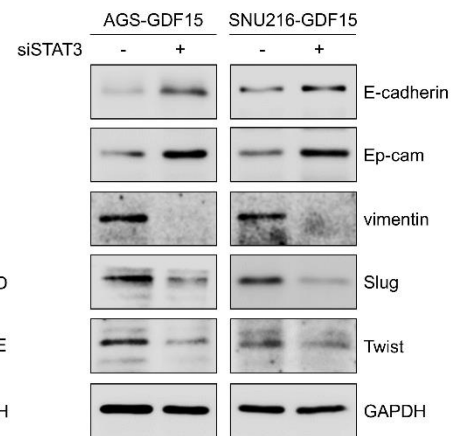

**Supplementary Figure S2.** (A) Western blotting analysis of components of several cancer-related pathways. (B) The correlation of GDF15 and STAT3 expression in GEPIA dataset. (C) Transiently transfected with control and STAT3 siRNA in GDF15-overexpressing cells. Western blotting analysis showing decreased phosphorylation of STAT3 and c-MYC. (D) Knockdown of STAT3 significantly downregulated cell cycle markers in GDF15-overexpressing cells. (E) Western blot analysis showed that STAT3 knockdown in GDF15 overexpressing cells increased expression of epithelial markers and decreased expression of mesenchymal markers.

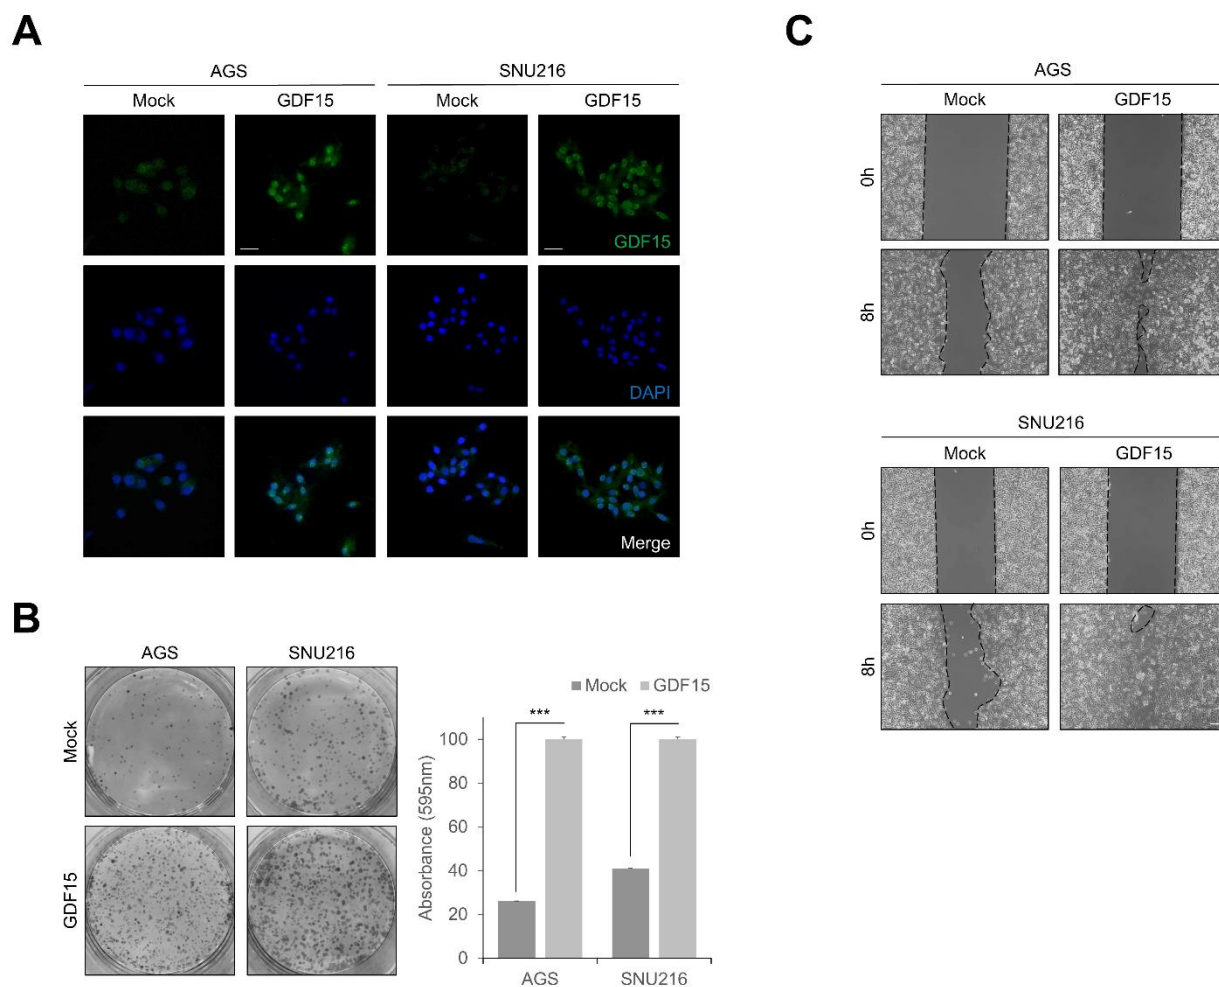

**Supplementary Figure S3.** (A) Immunofluorescence staining of GDF15 in GDF15-overexpressing cells. Scale bar, 100  $\mu$ m. (B) The colonogenic assay was performed on a 6-well culture plate in GDF15-overexpressing cells. Crystal-violet-stained cells were dissolved in 70% alcohol, and absorbance at 595 nm was measured using a spectrophotometer. Data are presented as the mean  $\pm$  SD and were evaluated using Student's t-test ( $n = 3$ ). (C) Gap closure assay in GDF15-overexpressing cells at 0h and 8h. ( $n = 3$ ) Scale bar, 100  $\mu$ m. Three independent experiments were carried out in triplicate. \*\*\*  $p < 0.001$ .
